# Supplementary material for: Enzymatic synthesis of an electrospinnable poly(butylene succinate-co-dilinoleic succinate) thermoplastic elastomer
Source: Royal Society of Chemistry journal article supplement (doi:10.1039/c7ra02509b), 2017-01-01
Supplement: c7ra02509b1.pdf [file c7ra02509b1.pdf]

## Supporting Information

### Enzymatic synthesis of electrospinnable poly(butylene succinate-co-dilinoleic succinate) thermoplastic elastomer

*Águeda Sonseca<sup>1</sup>, Mirosława El Fray<sup>1\*</sup>*

<sup>1</sup>Division of Biomaterials and Microbiological Technologies, Polymer Institute, West Pomeranian University of Technology, 45 Piastów Ave. 70-311, Szczecin, Poland

Dimer diols or dimeric fatty alcohols are formed by reduction of the terminal groups of the corresponding dimer fatty acid. PRIPOL 2033 is a high purity dimer linoleic diol, fully hydrogenated and distilled aliphatic dimer alcohol with purity of 96.5 %. It has to be taken into account that as in the commercial dimeric fatty acids from CRODA, in the case of the dimeric fatty alcohols, their main structure is a mixture of linear (acyclic) and cyclic dimer alcohols and their isomers, that contains in a small amount some impurities as trimers, oligomers, unsaturations or unreacted monomers.<sup>1,2</sup> Some possible structures are shown in **Figure S1**. Chemical structure of PRIPOL 2033 was verified by <sup>1</sup>H NMR and <sup>13</sup>C NMR and peaks were assigned to one of the most common structures. The results are presented in **Figures S2** and **S3** respectively.

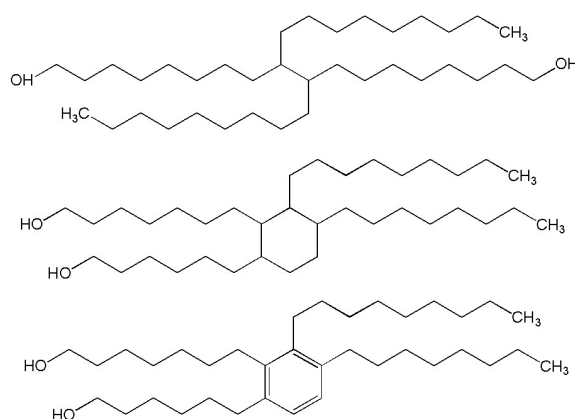

**Figure S1.** Some possible structures of PRIPOL 2033 dimeric fatty alcohol.

Regarding the <sup>1</sup>H NMR (**Figure S2**), the singlet at  $\delta^1\text{H} = 1.70$  ppm (exchangeable with D<sub>2</sub>O) is due to the hydroxyl end groups. Resonances at  $\delta^1\text{H} = 1.49\text{-}1.61$  ppm (f, g) correspond to the tertiary carbon protons and the methylene units attached to the  $-\text{CH}_2\text{OH}$  group. The triplet at  $\delta^1\text{H} = 3.63$  ppm (h) is due to the methylene units attached to the  $-\text{OH}$  terminal group. Resonances at  $\delta^1\text{H} = 1.26$  ppm (b, c, d, e, j) correspond to methylene protons attached to the methyl group and the rest of methylene protons, and resonances at  $\delta^1\text{H} = 0.83\text{-}0.87$  ppm (a) correspond to methyl protons. The resonances in the interval of  $\delta^1\text{H} = 6.7\text{-}7$  ppm can be related with the presence of aromatic protons which is in agreement with the appearance of the signal at  $\delta^1\text{H} = 2.54$  ppm

referred to a methylene protons adjacent to an aromatic moiety, and with the fact that no peaks were detected in the region of  $\delta^1\text{H} = 5\text{-}6$  ppm where unsaturation in aliphatic chains are having place.

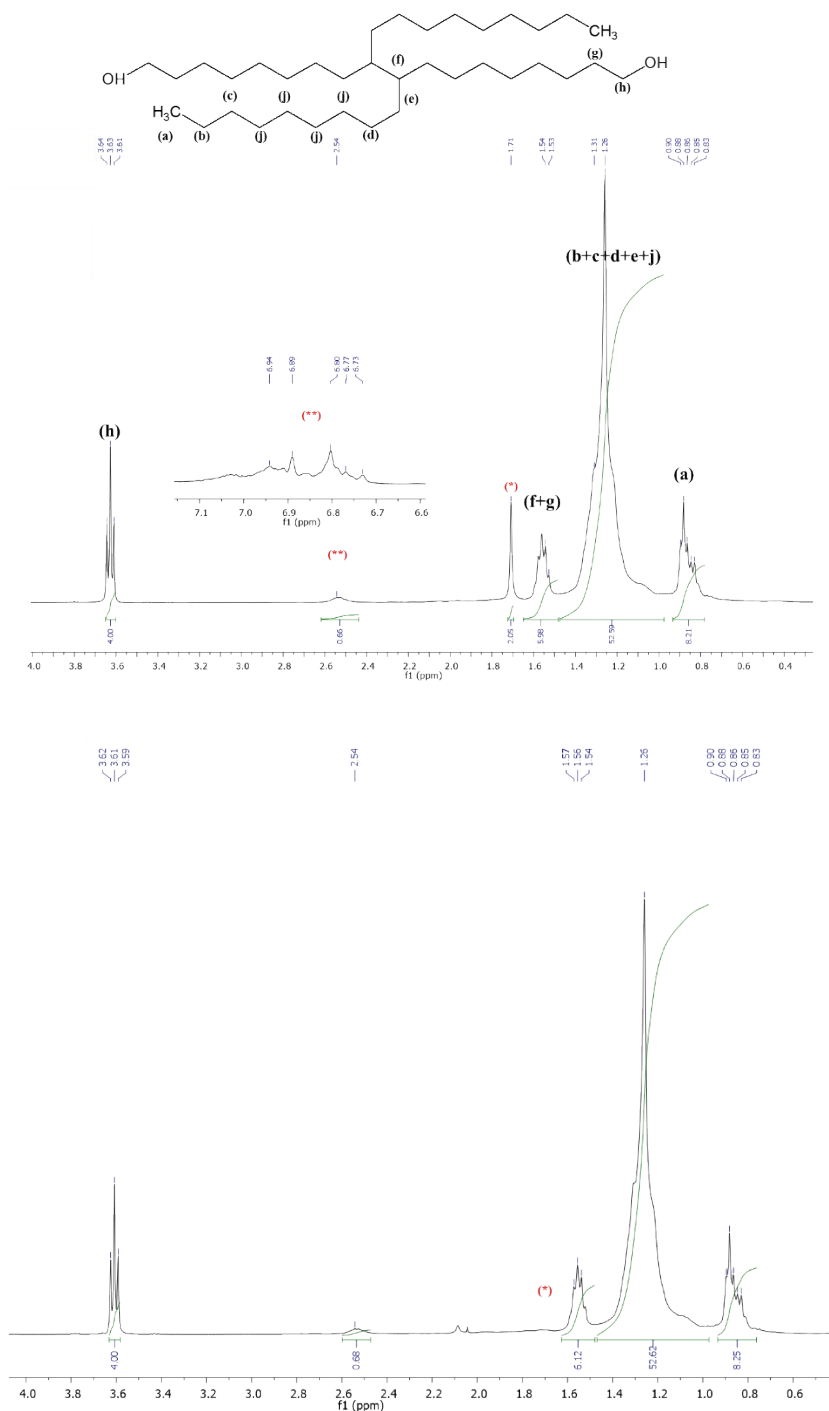

**Figure S2.** Top;  $^1\text{H}$  NMR of PRIPOL 2033 in  $\text{CDCl}_3$ . Bottom;  $^1\text{H}$  NMR of PRIPOL 2033 in  $\text{CDCl}_3$  with one drop of  $\text{D}_2\text{O}$ .

Regarding the  $^{13}\text{C}$  NMR (**Figure S3**), the peak at  $\delta^{13}\text{C} = 14.15$  ppm is due to the  $-\text{CH}_3$ ,  $\delta^{13}\text{C} = 22.71$  ppm is due to the  $\text{CH}_2-\text{CH}_3$ ,  $\delta^{13}\text{C} = 25.77$  ppm is due to the  $-\text{CH}_2-\text{CH}_2-\text{CH}_2-\text{OH}$ ,  $\delta^{13}\text{C} = 29.39-29.72$  ppm is due to the  $-\text{CH}_2-$ ,  $\delta^{13}\text{C} = 30.18$  ppm is due to the  $-\text{CH}_2-$  attached to the tertiary carbons,  $\delta^{13}\text{C} = 31.95$  ppm is due to the  $-\text{CH}_2-\text{CH}_2-\text{CH}_3$ ,  $\delta^{13}\text{C} = 32.81$  ppm is due to the  $-\text{CH}_2-\text{CH}_2-\text{OH}$ ,  $\delta^{13}\text{C} = 37.4$  ppm is due to the tertiary carbons, and  $\delta^{13}\text{C} = 63.02$  ppm is due to the  $-\text{CH}_2-\text{OH}$ . In agreement with the  $^1\text{H}$  NMR, the signals at  $\delta^{13}\text{C} = 26.71$ ,  $\delta^{13}\text{C} = 33.69$  ppm and  $\delta^{13}\text{C} = 37.12$  ppm can be related with the presence of aliphatic chains linked to a cyclic aliphatic structures or aromatic rings and the resonances at  $\delta^{13}\text{C} = 19.74$  ppm can be related to methyl carbons different from the ones from the end groups. In addition, the signal at  $\delta^{13}\text{C} = 37.12$  ppm can be related with the presence of  $-\text{CH}_2-$  adjacent to an aromatic carbon in agreement with the observations from  $^1\text{H}$  NMR.

It should be pointed out that high spectrum amplitude for  $^1\text{H}$  NMR and  $^{13}\text{C}$  NMR was employed to observe the protons and the carbons not present in the main structure proposed since they represent only a small portion of the total dimer structures present in the PRIPOL 2033.

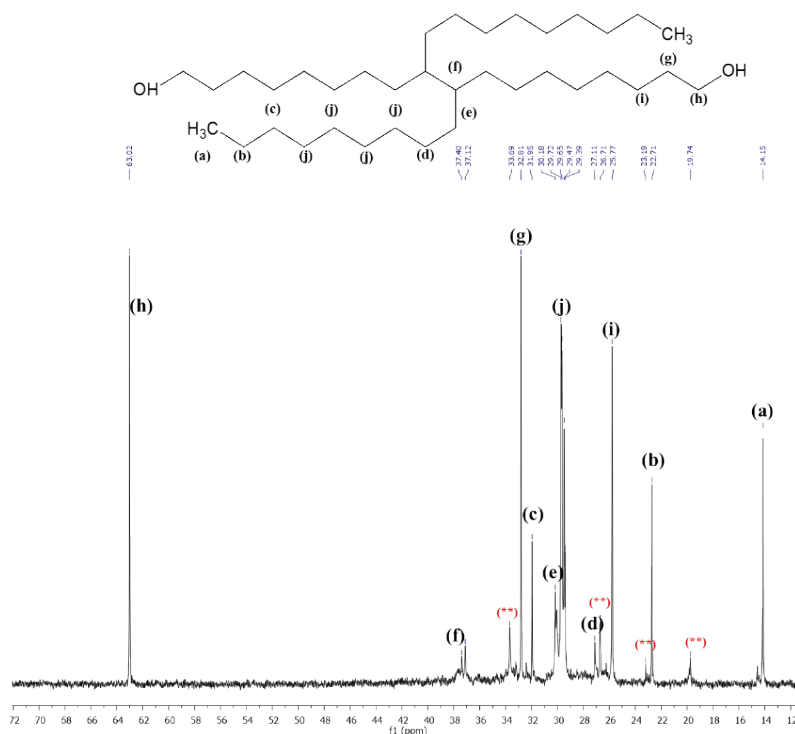

**Figure S3.**  $^{13}\text{C}$  NMR of PRIPOL 2033 in  $\text{CDCl}_3$ .

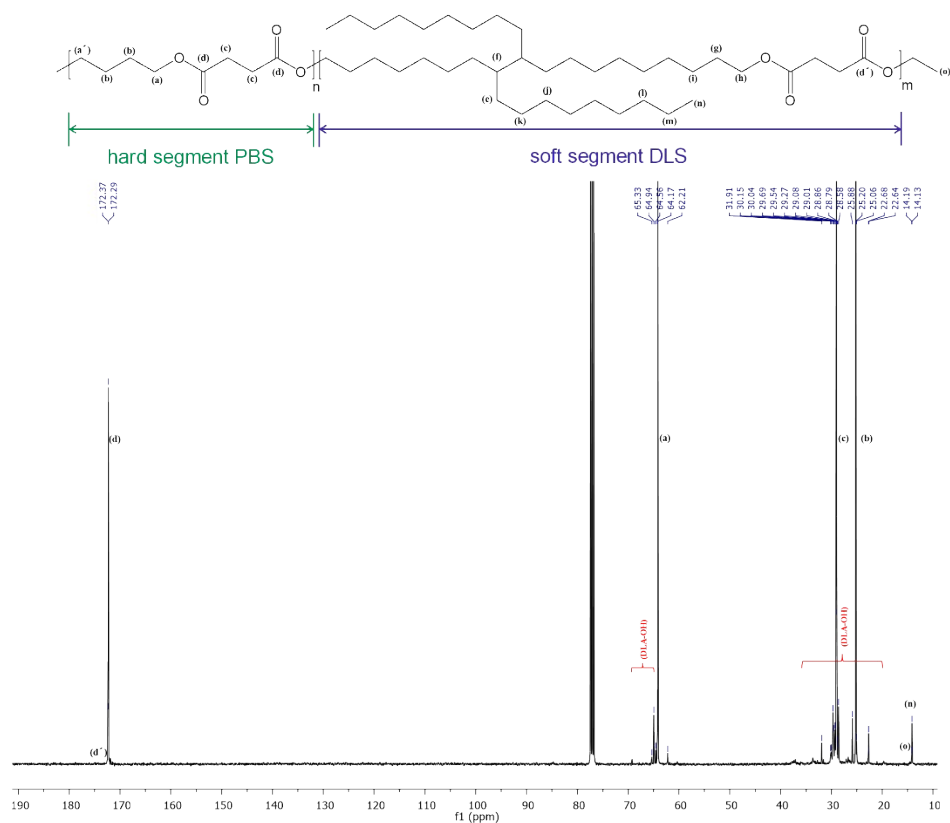

**Figure S4.**  $^{13}\text{C}$  NMR of the poly(butylene succinate-co-dilinoleic succinate) 70:30 copolymer.

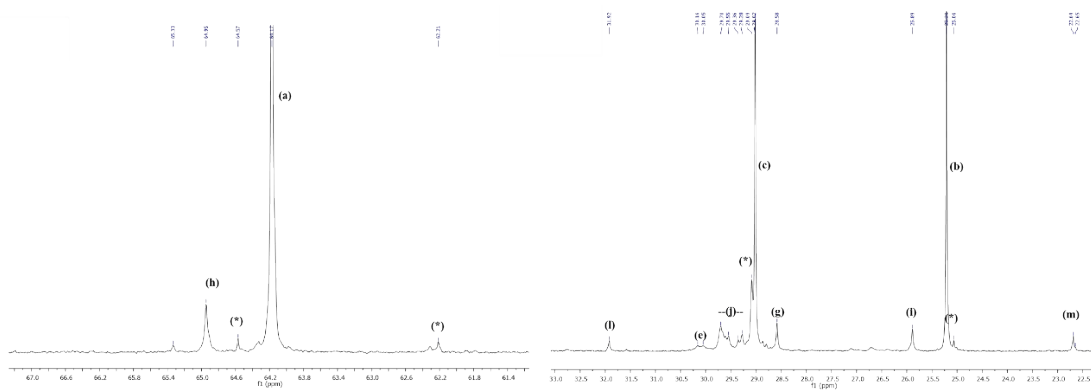

**Figure S5.**  $^{13}\text{C}$  NMR of the poly(butylene succinate-co-dilinoleic succinate) 70:30 copolymer. Regions from 22.5-33.0 ppm and 61.4-67.0 ppm.

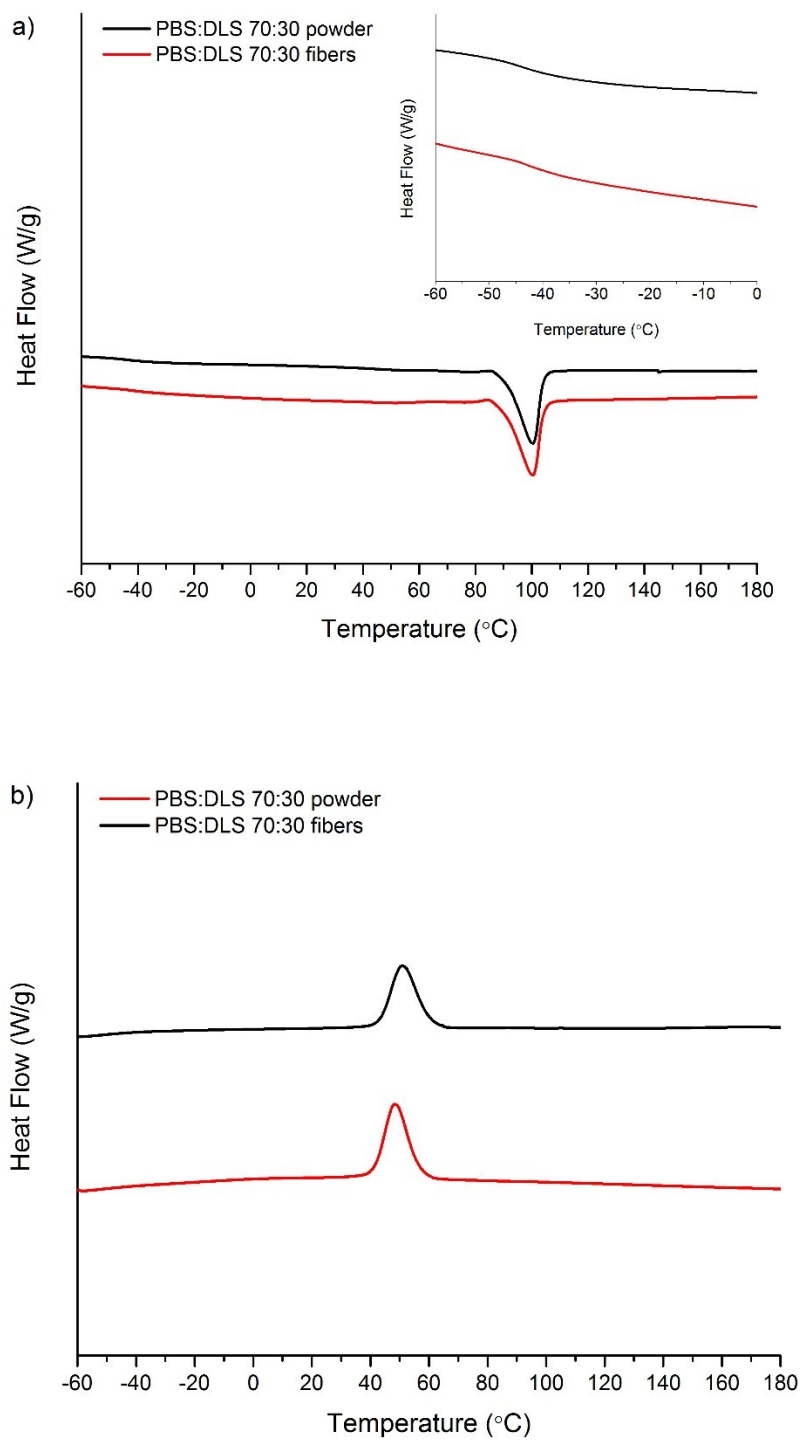

**Figure S6.** DSC thermograms of bulk and electrospun PBS:DLS 70:30 copolymer. Second heating (a) and cooling (b).

## References

1. A. Piegat, PhD thesis, West Pomeranian University of Technology Szczecin, 2010.
2. J. Skrobot, PhD thesis, West Pomeranian University of Technology Szczecin, 2014.
